# Supplementary material for: Investigation of protein-protein interactions and hot spot region between PD-1 and PD-L1 by fragment molecular orbital method
Source: PubMed Central journal article supplement (PMC6853875; doi:10.1038/s41598-019-53216-z), 2019-11-13
Supplement: 41598_2019_53216_MOESM1_ESM.pdf [file 41598_2019_53216_MOESM1_ESM.pdf]

## Supporting Information for

# Investigation of protein-protein interactions and hot spot region between PD-1 and PD-L1 by fragment molecular orbital method

Hocheol Lim<sup>1</sup>, Jungho Chun<sup>1</sup>, Xuemei Jin<sup>2</sup>, Jongwan Kim<sup>1, 2</sup>, JeongHyeok Yoon<sup>3</sup>, and Kyoung Tai No<sup>1, 2, ‡</sup>

<sup>1</sup>Department of Biotechnology, Yonsei University, Seoul, Republic of Korea

<sup>2</sup>Bioinformatics and Molecular Design Research Center (BMDRC), Yonsei University, Seoul, Republic of Korea

<sup>3</sup>Pharos I&BT Co., Ltd., Anyang-si, Gyeonggi-do, 14059, Korea

‡Corresponding Author.

E-mail: [ktno@bmdrc.org](mailto:ktno@bmdrc.org) (K. T. No)

The supporting information for ‘investigation of protein-protein interactions and hot spot region between PD-1 and PD-L1 by fragment molecular orbital method’ includes Table S1 – S21 for PIEDA results and water-bridge interactions among PD-1, PD-L1, and their inhibitors.

In this study, there are many abbreviations as follows. 3D-SPIEs, 3-Dimensional Scattered Pair Interaction Energies; EDA, Energy Decomposition Analysis; FMO, Fragment Molecular Orbitals method; HOP, Hybrid Orbital Projection; mAb, monoclonal Antibody; MM, Molecular Mechanics; PCM, Polarizable Continuum Model; PD-1, Programmed cell Death protein 1; PDB, Protein Data Bank; PD-L1, programmed Death Ligand-1; PIE, Pair Interaction Energy; PIEDA, Pair Interaction Energy Decomposition Analysis; PPI, Protein Protein Interactions; QM, Quantum Mechanics; RMSD, Root Mean Square Deviation of atomic positions; SCC, Self-Consistent-Charge; SCF, Self-Consistent Field.

**Table S1** The PIEDA of wild-type PD-1/PD-L1 complex

| PD-1   | PD-L1               | PIE     | $\Delta E^{es}$ | $\Delta E^{ex}$ | $\Delta E^{ct+mix}$ | $\Delta E^{di}$ | $\Delta G^{sol}$ |
|--------|---------------------|---------|-----------------|-----------------|---------------------|-----------------|------------------|
| Val064 | Asp122              | -3.946  | -2.152          | 0.001           | -0.075              | -0.136          | -1.585           |
| Asn066 | Asp122 <sup>b</sup> | -18.440 | -19.657         | 6.758           | -2.644              | -3.121          | 0.224            |
| Tyr068 | Asp122 <sup>a</sup> | -24.045 | -25.977         | 13.453          | -5.636              | -5.735          | -0.151           |
| Met070 | Arg125              | -7.473  | -5.874          | 1.531           | -0.520              | -1.886          | -0.725           |
| Ser073 | Asp026              | -17.694 | -13.337         | 0.515           | -1.996              | -1.591          | -1.284           |
| Asn074 | Arg125              | -10.826 | -3.526          | 0.112           | -0.356              | -0.679          | -6.377           |
| Gln075 | Asp026 <sup>a</sup> | -23.404 | -23.405         | 4.601           | -3.459              | -3.643          | 2.502            |
|        | Lys124              | -6.318  | -2.800          | 2.052           | -1.809              | -3.603          | -0.158           |
|        | Arg125 <sup>b</sup> | -31.290 | -34.446         | 10.113          | -4.795              | -5.994          | 3.833            |
|        | Ile126 <sup>b</sup> | -12.949 | -14.959         | 6.885           | -1.903              | -2.806          | -0.165           |
| Thr076 | Asp122              | -8.271  | -8.125          | -0.001          | -0.021              | -0.062          | -0.061           |
| Asp077 | Lys124              | -88.176 | -97.849         | 5.380           | -3.645              | -5.272          | 13.210           |
| Lys078 | Thr020 <sup>b</sup> | -37.320 | -40.093         | 8.110           | -3.343              | -4.765          | 2.771            |
|        | Asp122              | -97.338 | -97.834         | 4.639           | -3.232              | -5.206          | 4.294            |
| Glu084 | Ala018              | -34.412 | -62.832         | 0.131           | -0.874              | -0.631          | 29.794           |
|        | Phe019              | -22.275 | -18.097         | 1.106           | -2.953              | -2.741          | 0.411            |
|        | Gly120              | -8.334  | 1.061           | 0.541           | -1.346              | -1.586          | -7.004           |
|        | Ala121              | -8.604  | -9.663          | 0.000           | 0.049               | -0.195          | 1.205            |
| Lys131 | Asp073              | -5.767  | -15.739         | -0.001          | -0.076              | -0.163          | 10.211           |
| Ala132 | Gln066 <sup>a</sup> | -9.079  | -10.216         | 7.773           | -2.260              | -4.687          | 0.311            |
| Gln133 | Gln066              | -4.044  | -3.514          | 0.657           | -0.285              | -1.000          | 0.098            |
| Ile134 | Tyr056 <sup>a</sup> | -3.186  | -1.756          | 0.650           | -0.339              | -1.868          | 0.127            |
|        | Glu058 <sup>a</sup> | -13.224 | -11.334         | 0.880           | -1.934              | -2.120          | 1.284            |
|        | Tyr123 <sup>a</sup> | -3.389  | 0.171           | 2.562           | -1.437              | -4.753          | 0.068            |
| Lys135 | Glu058              | -21.908 | -25.791         | -0.001          | -0.009              | -0.114          | 4.006            |
| Glu136 | Arg113 <sup>a</sup> | -56.967 | -67.696         | 2.256           | -1.826              | -2.903          | 13.202           |
|        | Tyr123 <sup>a</sup> | -29.400 | -29.698         | 10.736          | -4.650              | -5.800          | 0.012            |
|        | Arg125 <sup>a</sup> | -88.219 | -96.646         | 7.258           | -5.329              | -4.636          | 11.134           |

All energies are in kcal/mol.

The calculation has MP2/6-31G\*\*/PCM level

<sup>a</sup> The interactions were reported in ref 7

<sup>b</sup> The interactions were shifted by HOP fragmentation

**Table S2** Water-bridge interaction in PD-1/PD-L1 complex

| <b>PIE</b> | <b>PD-1</b>         | <b>Water molecules</b> | <b>PD-L1</b>        | <b>PIE</b> |
|------------|---------------------|------------------------|---------------------|------------|
| -9.941     | Ile134 <sup>a</sup> | HOH202                 | Tyr056 <sup>a</sup> | -7.769     |
|            |                     |                        | Glu058 <sup>a</sup> | -18.794    |
|            |                     |                        | Asp061              | -3.257     |
| -14.333    | Asn066 <sup>a</sup> | HOH203                 | Ala121 <sup>a</sup> | -7.517     |
| -12.574    | Lys078              |                        |                     |            |

All energies are in kcal/mol.

The calculation has MP2/6-31G\*\*/PCM level

<sup>a</sup> The interactions were reported in ref 7

**Table S3** The PIEDA of PD-1/Nivolumab complex

| PD-1   | Nivolumab              | PIE     | $\Delta E^{es}$ | $\Delta E^{ex}$ | $\Delta E^{ct+mix}$ | $\Delta E^{di}$ | $\Delta G^{sol}$ |
|--------|------------------------|---------|-----------------|-----------------|---------------------|-----------------|------------------|
| Leu025 | HC Trp052 <sup>a</sup> | -8.020  | -5.679          | 1.363           | -0.883              | -2.159          | -0.662           |
|        | HC Lys057 <sup>a</sup> | -12.298 | -5.238          | 5.461           | -2.012              | -2.058          | -8.450           |
| Asp026 | HC Lys057              | -33.594 | -49.658         | 0.130           | -1.301              | -1.001          | 18.237           |
|        | LC Trp094              | -4.839  | -7.077          | -0.001          | 0.062               | -0.159          | 2.336            |
| Ser027 | LC Arg096              | -9.336  | -8.955          | -0.001          | 0.030               | -0.067          | -0.343           |
| Pro028 | HC Trp052              | -8.811  | -5.361          | 8.913           | -3.867              | -9.023          | 0.527            |
| Asp029 | HC Asn031              | -4.968  | -3.730          | -0.001          | -0.009              | -0.059          | -1.168           |
|        | HC Gly033 <sup>a</sup> | -24.853 | -28.605         | 12.141          | -4.577              | -5.190          | 1.379            |
|        | HC Tyr053              | -15.492 | -14.831         | 7.436           | -3.571              | -5.447          | 0.922            |
|        | HC Asn099              | -44.153 | -42.391         | 7.548           | -5.007              | -5.457          | 1.154            |
| Arg030 | HC Ser030 <sup>a</sup> | -5.587  | -1.590          | 0.173           | -0.587              | -0.917          | -2.666           |
|        | HC Asn031 <sup>a</sup> | -39.769 | -42.963         | 9.945           | -5.807              | -8.346          | 7.402            |
|        | HC Ser032 <sup>b</sup> | -6.425  | -8.273          | 6.973           | -0.876              | -3.320          | -0.929           |
|        | HC Asp054              | -33.271 | -53.493         | -0.001          | -0.030              | -0.431          | 20.685           |
| Pro031 | HC Asn031              | -3.503  | -3.511          | 0.000           | 0.003               | -0.191          | 0.196            |
| Ser060 | HC Asn031              | -5.349  | -3.133          | 1.789           | -1.519              | -1.952          | -0.534           |
| Ala129 | HC Asp101              | -3.039  | -2.558          | 0.149           | -0.570              | -0.518          | 0.458            |
| Pro130 | HC Asp100              | -4.510  | -4.245          | 0.001           | -0.066              | -0.351          | 0.152            |
|        | HC Asp101              | -6.093  | -3.715          | 1.661           | -1.504              | -2.782          | 0.246            |
|        | HC Tyr102              | -6.895  | -4.130          | 4.504           | -0.826              | -6.019          | -0.424           |
|        | LC Thr056 <sup>b</sup> | -4.405  | -2.170          | 2.833           | -2.092              | -3.108          | 0.133            |
| Lys131 | HC Asp100 <sup>a</sup> | -47.739 | -59.225         | 6.492           | -3.205              | -4.100          | 12.299           |
|        | HC Asp101 <sup>a</sup> | -94.442 | -108.606        | 9.127           | -3.741              | -7.583          | 16.361           |
|        | LC Tyr049 <sup>a</sup> | -14.049 | -11.087         | 6.225           | -2.350              | -6.844          | 0.006            |
|        | LC Asp050              | -36.277 | -50.776         | 0.013           | -0.390              | -0.431          | 15.306           |
|        | LC Thr056 <sup>b</sup> | -11.119 | -10.780         | 3.131           | 0.447               | -3.028          | -0.889           |
| Ala132 | HC Asp101              | -6.638  | -4.749          | 0.006           | 0.046               | -0.201          | -1.740           |
|        | LC Tyr049 <sup>a</sup> | -3.813  | -1.581          | 0.961           | -0.807              | -2.551          | 0.166            |
| Gln133 | LC Tyr049              | -9.668  | -10.095         | 3.855           | -1.468              | -2.894          | 0.934            |

All energies are in kcal/mol.

The calculation has MP2/6-31G\*\*/PCM level

The subscripts HC and LC indicate the heavy and light chain, respectively

<sup>a</sup> The interactions were reported in ref 26

<sup>b</sup> The interactions were shifted by HOP fragmentation

**Table S4** Water-bridge interaction in PD-1/Nivolumab

| PIE     | PD-1   | Water molecules     | Nivolumab            | PIE     |
|---------|--------|---------------------|----------------------|---------|
| -3.505  | Asp029 | <sup>G</sup> HOH404 | <sub>HC</sub> Ser032 | -9.776  |
| -10.524 | Pro031 |                     |                      |         |
| -20.791 | Asp029 | <sup>G</sup> HOH405 | <sub>HC</sub> Ser032 | -5.404  |
|         |        |                     | <sub>HC</sub> Thr098 | -3.455  |
|         |        |                     | <sub>HC</sub> Asp100 | -12.94  |
| -6.703  | Asp026 | <sup>G</sup> HOH409 | <sub>LC</sub> Trp094 | -9.927  |
| -11.111 | Ser027 |                     |                      |         |
| -4.07   | Ala129 | <sup>H</sup> HOH343 | <sub>HC</sub> Tyr102 | -9.146  |
| -6.864  | Asp026 | <sup>H</sup> HOH364 | <sub>HC</sub> Lys057 | -4.225  |
|         |        |                     | <sub>HC</sub> Tyr059 | -10.276 |
| -6.018  | Lys131 | <sup>L</sup> HOH336 | <sub>LC</sub> Leu033 | -5.417  |
|         |        |                     | <sub>LC</sub> Gln089 | -4.301  |
|         |        |                     | <sub>LC</sub> Gln090 | -11.526 |
|         |        |                     | <sub>LC</sub> Ser091 | -7.029  |
| -4.351  | Lys131 | <sup>L</sup> HOH350 | <sub>LC</sub> Asp050 | -22.135 |
|         |        |                     | <sub>LC</sub> Ser091 | -8.936  |
| -7.223  | Asp026 | <sup>L</sup> HOH352 | <sub>LC</sub> Ser092 | -10.764 |
| -11.641 | Lys131 | <sup>L</sup> HOH357 | <sub>LC</sub> Asp050 | -25.384 |
| -12.873 | Leu128 | <sup>L</sup> HOH370 | <sub>LC</sub> Thr056 | -7.966  |

All energies are in kcal/mol.

The calculation has MP2/6-31G\*\*/PCM level

The subscripts HC and LC indicate the heavy and light chain, respectively

The superscripts G, H and L indicate the chain arrangement

**Table S5** The PIEDA of PD-1/Pembrolizumab complex

| PD-1   | Pembrolizumab          | PIE      | $\Delta E^{es}$ | $\Delta E^{ex}$ | $\Delta E^{ct+mix}$ | $\Delta E^{di}$ | $\Delta G^{sol}$ |
|--------|------------------------|----------|-----------------|-----------------|---------------------|-----------------|------------------|
| Glu061 | LC Tyr034 <sup>b</sup> | -12.280  | -3.189          | 5.118           | -2.258              | -5.767          | -6.184           |
|        | LC Tyr057 <sup>a</sup> | -3.582   | 0.274           | 0.000           | -0.202              | -0.309          | -3.345           |
| Ser062 | LC Tyr057 <sup>b</sup> | -15.439  | -13.379         | 4.517           | -3.056              | -3.452          | -0.070           |
| Val064 | LC Tyr034              | -18.903  | -18.956         | 9.389           | -3.663              | -5.057          | -0.616           |
|        | HC Phe103 <sup>c</sup> | -3.806   | -1.993          | 5.227           | -1.365              | -5.559          | -0.116           |
| Asn066 | HC Arg102 <sup>a</sup> | -8.779   | -7.464          | 2.506           | -1.904              | -2.582          | 0.665            |
|        | HC Phe103 <sup>c</sup> | -7.510   | -10.298         | 6.343           | -0.409              | -3.260          | 0.114            |
| Tyr068 | HC Arg102 <sup>c</sup> | -9.225   | -7.600          | 3.285           | -1.848              | -3.427          | 0.365            |
| Gln075 | HC Thr030 <sup>a</sup> | -12.646  | -12.391         | 4.437           | -2.416              | -3.050          | 0.775            |
| Thr076 | HC Tyr101 <sup>a</sup> | -6.315   | -5.573          | 2.505           | -1.287              | -2.012          | 0.052            |
| Asp077 | HC Asn052              | -7.264   | -5.571          | 0.040           | -0.725              | -0.591          | -0.418           |
|        | HC Ser054 <sup>a</sup> | -20.758  | -23.572         | 7.585           | -4.047              | -3.628          | 2.904            |
|        | HC Asn055              | -11.547  | -6.649          | 0.029           | -0.676              | -0.770          | -3.480           |
| Lys078 | HC Tyr033 <sup>a</sup> | -15.002  | -10.741         | 2.633           | -1.390              | -3.144          | -2.361           |
|        | HC Tyr101 <sup>a</sup> | -6.560   | -3.266          | 1.603           | -1.026              | -2.987          | -0.884           |
|        | HC Arg102 <sup>c</sup> | -9.110   | -2.897          | 7.360           | -3.127              | -4.348          | -6.097           |
|        | HC Phe103 <sup>c</sup> | -15.373  | -13.580         | 1.157           | -0.899              | -1.986          | -0.064           |
| Pro083 | LC Tyr034              | -4.164   | -1.895          | 4.879           | -1.664              | -5.300          | -0.183           |
| Asp085 | HC Arg099 <sup>a</sup> | -121.969 | -129.140        | 20.531          | -6.981              | -7.377          | 0.998            |
|        | HC Arg102 <sup>c</sup> | -11.489  | -16.723         | 0.000           | -0.046              | -0.089          | 5.369            |
| Arg086 | LC Asp097 <sup>a</sup> | -68.921  | -87.219         | 7.265           | -3.558              | -5.923          | 20.513           |
| Gln088 | HC Tyr033 <sup>c</sup> | -5.131   | -1.884          | 2.199           | -1.541              | -3.747          | -0.158           |
|        | HC Tyr035 <sup>b</sup> | -16.078  | -18.297         | 9.712           | -3.588              | -3.828          | -0.077           |
|        | HC Asn059 <sup>a</sup> | -7.206   | -7.013          | 3.460           | -1.485              | -2.243          | 0.075            |
|        | HC Arg099              | -8.688   | -7.583          | 0.045           | -0.274              | -0.662          | -0.215           |
| Pro089 | HC Tyr035 <sup>c</sup> | -4.752   | -2.261          | 1.859           | -1.369              | -3.041          | 0.060            |
|        | HC Thr058              | -5.156   | -4.129          | 2.126           | -1.199              | -1.967          | 0.014            |
|        | HC Asn059              | -4.004   | -0.977          | 2.608           | -1.461              | -4.325          | 0.151            |
| Gly090 | HC Asn052              | -8.425   | -6.647          | 0.617           | -0.757              | -1.148          | -0.490           |
|        | HC Gly057              | -3.176   | -3.095          | 1.189           | -0.638              | -0.509          | -0.124           |
| Gln091 | HC Asn059              | -4.188   | -3.845          | 0.045           | 0.043               | -0.329          | -0.103           |
| Ile126 | HC Arg102 <sup>c</sup> | -5.668   | -4.222          | 1.543           | -0.429              | -2.362          | -0.198           |
| Ala129 | LC Tyr053              | -17.199  | -16.870         | 6.716           | -3.238              | -3.628          | -0.179           |
| Pro130 | LC Tyr057              | -3.213   | -1.944          | 1.192           | -0.380              | -2.445          | 0.365            |
| Ala132 | HC Asp100              | -4.275   | -3.163          | -0.001          | 0.048               | -0.017          | -1.141           |
| Ile134 | HC Arg102 <sup>c</sup> | -5.235   | 1.650           | 2.851           | -1.021              | -3.915          | -4.800           |
| Glu136 | HC Arg102              | -39.192  | -52.576         | -0.001          | -0.054              | -0.132          | 13.572           |

All energies are in kcal/mol.

The calculation has MP2/6-31G\*\*/PCM level

The subscripts HC and LC indicate the heavy and light chain, respectively

<sup>a</sup> The interactions were reported in ref 27

<sup>b</sup> The interactions were shifted by HOP fragmentation

<sup>c</sup> The interactions were reported in ref 28

**Table S6** Water-bridge interaction in PD-1/Pembrolizumab

| PIE     | PD-1   | Water molecules     | Pembrolizumab        | PIE     |
|---------|--------|---------------------|----------------------|---------|
| -20.188 | Asp077 | <sup>C</sup> HOH404 | <sub>HC</sub> Asn055 | -8.167  |
| -8.419  | Thr076 | <sup>C</sup> HOH405 | <sub>HC</sub> Tyr101 | -5.010  |
| -23.505 | Glu136 |                     | <sub>HC</sub> Arg102 | -22.132 |
| -8.297  | Gln088 | <sup>C</sup> HOH408 | <sub>HC</sub> Asn052 | -4.832  |
| -10.283 | Gly090 |                     | <sub>HC</sub> Asn055 | -6.960  |
| -6.086  | Gln091 |                     |                      |         |
| -10.442 | Asp085 | <sup>C</sup> HOH411 | <sub>LC</sub> Arg096 | -6.690  |
| -3.945  | Arg086 |                     |                      |         |
| -6.469  | Gln099 | <sup>C</sup> HOH414 | <sub>LC</sub> Ser032 | -7.828  |
| -9.927  | Ser087 | <sup>C</sup> HOH417 | <sub>HC</sub> Asn059 | -7.535  |
| -11.911 | Pro089 |                     |                      |         |
| -7.141  | Arg086 | <sup>C</sup> HOH419 | <sub>LC</sub> Arg096 | -5.206  |
| -3.309  | Ser087 |                     |                      |         |
| -10.940 | Ser087 | <sup>C</sup> HOH421 | <sub>LC</sub> Ser095 | -4.282  |
|         |        |                     | <sub>HC</sub> Arg099 | -4.346  |
|         |        |                     | <sub>HC</sub> Asp104 | -3.174  |
| -6.084  | Lys131 | <sup>C</sup> HOH422 | <sub>LC</sub> Tyr053 | -7.109  |
| -8.027  | Ala132 |                     |                      |         |

All energies are in kcal/mol.

The calculation has MP2/6-31G\*\*/PCM level

The subscripts HC and LC indicate the heavy and light chain, respectively

The superscript C indicates the chain arrangement

**Table S7** The PIEDA of BMS-936559/PD-L1 complex

| PD-L1  | BMS-936559             | PIE     | $\Delta E^{\text{es}}$ | $\Delta E^{\text{ex}}$ | $\Delta E^{\text{ct+mix}}$ | $\Delta E^{\text{di}}$ | $\Delta G^{\text{sol}}$ |
|--------|------------------------|---------|------------------------|------------------------|----------------------------|------------------------|-------------------------|
| Asp049 | HC Ser104              | -4.704  | 3.117                  | 1.566                  | -1.154                     | -1.749                 | -6.483                  |
|        | HC Gly105 <sup>a</sup> | -26.106 | -27.028                | 8.119                  | -3.955                     | -3.698                 | 0.456                   |
|        | LC Tyr032 <sup>a</sup> | -26.436 | -21.093                | 7.901                  | -4.019                     | -5.045                 | -4.180                  |
| Ala052 | HC Pro107              | -6.266  | -5.534                 | 2.016                  | -0.968                     | -2.178                 | 0.398                   |
| Tyr056 | HC Lys057              | -6.029  | -6.858                 | 2.030                  | -1.324                     | -2.492                 | 2.614                   |
|        | HC His059 <sup>a</sup> | -13.155 | -13.479                | 7.588                  | -2.587                     | -4.059                 | -0.619                  |
| Glu058 | HC Lys057 <sup>a</sup> | -81.784 | -98.690                | 0.994                  | -3.375                     | -2.919                 | 22.205                  |
| Gln066 | HC Lys057              | -11.069 | -13.310                | 0.002                  | -0.008                     | -0.095                 | 2.342                   |
| His069 | HC Ser106 <sup>a</sup> | -14.659 | -16.859                | 9.688                  | -3.140                     | -4.365                 | 0.018                   |
|        | HC Pro107              | -3.703  | -2.865                 | 0.146                  | -0.090                     | -1.023                 | 0.129                   |
|        | HC Phe108              | -3.336  | -2.292                 | 0.063                  | -0.246                     | -0.790                 | -0.072                  |
|        | LC Asn093              | -6.134  | -3.897                 | 3.670                  | -2.104                     | -4.038                 | 0.236                   |
|        | LC Trp094              | -5.582  | -1.265                 | 4.812                  | -1.150                     | -8.011                 | 0.032                   |
| Glu071 | LC Asn093              | -8.260  | -1.024                 | 0.068                  | -1.252                     | -0.747                 | -5.306                  |
| Arg113 | HC Phe055              | -5.104  | -11.835                | 0.009                  | -0.234                     | -0.436                 | 7.393                   |
|        | HC Gly056              | -7.200  | -8.391                 | 0.002                  | -0.170                     | -0.162                 | 1.521                   |
| Asp122 | HC Ile054              | -3.410  | -2.065                 | 0.860                  | -0.746                     | -1.570                 | 0.110                   |

All energies are in kcal/mol.

The calculation has MP2/6-31G\*\*/PCM level

The subscripts HC and LC indicate the heavy and light chain, respectively

<sup>a</sup> The interactions were reported in ref 29



**Table S8** The PIEDA of Avelumab/PD-L1 complex

| PD-L1  | Avelumab               | PIE     | $\Delta E^{es}$ | $\Delta E^{ex}$ | $\Delta E^{ct+mix}$ | $\Delta E^{di}$ | $\Delta G^{sol}$ |
|--------|------------------------|---------|-----------------|-----------------|---------------------|-----------------|------------------|
| Cys040 | HC Tyr052              | -3.060  | -2.874          | 0.995           | -1.079              | -1.488          | 1.386            |
|        | HC Phe059              | -5.626  | -4.946          | 0.895           | -1.080              | -1.830          | 1.336            |
|        | LC Ser097              | -4.444  | -4.083          | 0.460           | -0.773              | -1.425          | 1.377            |
|        | LC Thr098              | -3.048  | -6.490          | -0.002          | -0.159              | -0.132          | 3.735            |
| Tyr056 | HC Tyr052              | -4.647  | -1.312          | 2.475           | -1.466              | -4.356          | 0.012            |
|        | HC Pro053              | -4.107  | -2.085          | 1.821           | -1.032              | -2.974          | 0.163            |
|        | HC Gly055 <sup>b</sup> | -15.266 | -18.766         | 9.933           | -2.766              | -3.370          | -0.297           |
| Glu058 | HC Tyr052 <sup>a</sup> | -34.723 | -33.867         | 11.382          | -6.653              | -5.944          | 0.359            |
|        | HC Val104 <sup>a</sup> | -8.571  | -1.107          | 3.259           | -2.294              | -4.140          | -4.289           |
| Glu060 | HC Val104              | -3.823  | -2.277          | -0.001          | 0.011               | -0.133          | -1.423           |
|        | LC Tyr032              | -9.616  | 1.213           | 1.779           | -2.681              | -3.502          | -6.426           |
|        | LC Tyr034 <sup>a</sup> | -31.027 | -28.601         | 10.477          | -6.069              | -6.805          | -0.028           |
|        | LC Tyr093              | -4.306  | -2.288          | 3.100           | -1.607              | -3.268          | -0.244           |
| Asp061 | HC Val104 <sup>a</sup> | -15.412 | -9.395          | 1.971           | -2.001              | -3.184          | -2.803           |
|        | HC Thr105 <sup>a</sup> | -37.466 | -34.641         | 9.561           | -5.066              | -6.091          | -1.229           |
|        | HC Thr106 <sup>a</sup> | -26.084 | -21.194         | 4.278           | -2.815              | -4.146          | -2.207           |
|        | LC Tyr034              | -6.208  | -1.811          | 7.496           | -3.502              | -7.379          | -1.012           |
|        | LC Tyr093              | -9.610  | -5.705          | 3.498           | -0.945              | -6.763          | 0.306            |
|        | LC Arg099              | -76.718 | -80.484         | 2.443           | -2.498              | -2.868          | 6.690            |
| Lys062 | HC Thr103              | -10.186 | -8.068          | 4.681           | -3.140              | -3.361          | -0.298           |
|        | HC Val104              | -7.175  | -11.077         | 6.765           | -0.026              | -4.404          | 1.568            |
|        | LC Tyr034              | -5.035  | -5.901          | 2.312           | -0.877              | -3.294          | 2.725            |
| Asn063 | HC Thr103 <sup>b</sup> | -13.213 | -19.890         | 15.182          | -3.443              | -4.314          | -0.747           |
| Gln066 | HC Pro053              | -3.099  | -2.009          | 1.361           | -1.020              | -1.951          | 0.519            |
| His069 | HC Ser054              | -3.824  | -2.918          | 0.267           | -1.053              | -1.258          | 1.139            |
| Asp073 | HC Ser031              | -4.520  | 2.112           | 0.863           | -1.443              | -1.335          | -4.716           |
| Lys075 | HC Thr028              | -5.438  | -0.934          | 0.730           | -0.824              | -1.392          | -3.019           |
|        | HC Phe029              | -7.605  | -7.009          | -0.001          | 0.011               | -0.125          | -0.482           |
| His078 | HC Thr103              | -7.529  | -6.071          | 0.966           | -1.110              | -2.011          | 0.698            |
| Ser117 | HC Gly056              | -10.351 | -14.699         | 10.015          | -1.372              | -3.135          | -1.161           |
| Tyr123 | HC Phe059              | -4.465  | -3.702          | 2.746           | -1.375              | -3.959          | 1.825            |
| Arg125 | LC Ser096              | -5.904  | -9.773          | 0.057           | -0.212              | -0.479          | 4.502            |
|        | LC Ser097              | -3.552  | -4.937          | 0.779           | -0.378              | -1.000          | 1.984            |

All energies are in kcal/mol.

The calculation has MP2/6-31G\*\*/PCM level

The subscripts HC and LC indicate the heavy and light chain, respectively

<sup>a</sup> The interactions were reported in ref 30

<sup>b</sup> The interactions were shifted by HOP fragmentation

**Table S9** The PIEDA of KN035/PD-L1 complex

| PD-L1               | KN035  | PIE      | $\Delta E^{es}$ | $\Delta E^{ex}$ | $\Delta E^{ct+mix}$ | $\Delta E^{di}$ | $\Delta G^{sol}$ |
|---------------------|--------|----------|-----------------|-----------------|---------------------|-----------------|------------------|
| Tyr056 <sup>a</sup> | Phe101 | -7.357   | -3.222          | 2.993           | -2.269              | -4.921          | 0.062            |
|                     | Glu102 | -4.224   | -4.257          | 5.397           | -1.490              | -4.121          | 0.247            |
|                     | Thr105 | -3.508   | -1.350          | 3.350           | -1.643              | -3.790          | -0.075           |
| Glu058 <sup>a</sup> | Arg032 | -54.069  | -55.113         | -0.001          | 0.116               | -0.113          | 1.043            |
|                     | Ser100 | -29.974  | -29.664         | 9.014           | -4.309              | -4.036          | -0.978           |
|                     | Gln116 | -11.104  | -9.490          | -0.001          | -0.083              | -0.032          | -1.497           |
| Glu060              | Lys027 | -28.678  | -58.255         | 0.009           | -0.174              | -0.295          | 30.038           |
| Asp061 <sup>a</sup> | Lys027 | -76.952  | -92.245         | 1.490           | -2.476              | -2.550          | 18.828           |
|                     | Ser029 | -30.562  | -30.845         | 10.202          | -5.592              | -4.737          | 0.410            |
|                     | Ser030 | -11.927  | -9.750          | 9.522           | -5.228              | -6.413          | -0.058           |
|                     | Arg032 | -48.809  | -47.853         | 0.401           | -0.486              | -1.076          | 0.205            |
|                     | Ser100 | -10.445  | -8.297          | 0.724           | -0.778              | -1.466          | -0.629           |
| Lys062              | Glu102 | -21.701  | -36.539         | -0.001          | -0.034              | -0.3            | 15.174           |
| Asn063 <sup>a</sup> | Glu102 | -6.883   | -6.194          | 0.957           | -0.368              | -1.529          | 0.251            |
| Gln066 <sup>a</sup> | Cys033 | -5.239   | -4.907          | 0.024           | -0.061              | -0.245          | -0.051           |
|                     | Pro104 | -12.456  | -9.744          | 3.396           | -2.276              | -4.048          | 0.216            |
|                     | Thr105 | -21.563  | -19.144         | 7.206           | -4.021              | -5.352          | -0.252           |
| Arg113 <sup>a</sup> | Asp099 | -105.383 | -105.168        | 7.643           | -3.744              | -5.163          | 1.048            |
|                     | Phe115 | -13.989  | -13.316         | 0.036           | -0.281              | -0.517          | 0.089            |
| Met115 <sup>a</sup> | Phe101 | -3.153   | -1.548          | 3.017           | -0.902              | -3.652          | -0.069           |
| Ala121              | Ser111 | -3.465   | -2.141          | 2.168           | -0.893              | -2.166          | -0.434           |
| Asp122              | Gly113 | -3.960   | -3.675          | 2.006           | -1.397              | -1.342          | 0.448            |
| Tyr123 <sup>a</sup> | Ala114 | -7.463   | -5.773          | 0.763           | -0.443              | -2.068          | 0.059            |
|                     | Gln116 | -6.100   | -2.926          | 2.741           | -1.799              | -4.239          | 0.123            |
| Arg125 <sup>a</sup> | Gln116 | -15.042  | -19.258         | 5.429           | -3.211              | -3.419          | 5.416            |

All energies are in kcal/mol.

The calculation has MP2/6-31G\*\*/PCM level

The subscripts HC and LC indicate the heavy and light chain, respectively

<sup>a</sup> The residues were related with the mutagenesis data in ref 31 and 32

**Table S10** Water-bridge interaction in KN035/PD-L1

| PIE     | PD-L1  | Water molecules     | KN035  | PIE     |
|---------|--------|---------------------|--------|---------|
| -27.897 | Asp122 | <sup>A</sup> HOH311 | Ala114 | -13.16  |
| -5.198  | Asp061 | <sup>A</sup> HOH312 | Ser030 | -9.996  |
| -12.84  | Asp061 | <sup>A</sup> HOH330 | Ser030 | -4.636  |
| -19.469 | Lys062 | <sup>A</sup> HOH341 | Glu102 | -23.736 |
| -8.59   | Asn063 |                     |        |         |
| -28.689 | Asp073 | <sup>B</sup> HOH303 | Asp103 | -3.576  |
|         |        |                     | Pro104 | -11.639 |
| -6.428  | Glu060 | <sup>B</sup> HOH326 | Lys027 | -17.026 |
| -17.847 | Asp061 |                     |        |         |
| -6.586  | Ser117 | <sup>B</sup> HOH331 | Thr110 | -3.944  |
|         |        |                     | Ser111 | -8.994  |
| -18.332 | Glu058 | <sup>B</sup> HOH339 | Gln116 | -3.154  |
| -19.335 | Asp061 |                     |        |         |
| -3.833  | Arg125 |                     |        |         |
| -4.821  | Glu058 | <sup>B</sup> HOH364 | Gln116 | -3.83   |
| -8.207  | Asp061 |                     |        |         |
| -18.396 | Arg125 |                     |        |         |

All energies are in kcal/mol.

The calculation has MP2/6-31G\*\*/PCM level

The superscripts A and B indicate the chain arrangement

**Table S11** The PIEDA of Atezolizumab/PD-L1 complex

| PD-L1               | Atezolizumab           | PIE     | $\Delta E^{es}$ | $\Delta E^{ex}$ | $\Delta E^{ct+mix}$ | $\Delta E^{di}$ | $\Delta G^{sol}$ |
|---------------------|------------------------|---------|-----------------|-----------------|---------------------|-----------------|------------------|
| Ala018              | HCPro102               | -5.209  | -1.187          | 0.534           | -0.002              | -1.020          | -3.533           |
| Asp049              | LCGln027               | -4.195  | -4.528          | -0.001          | -0.081              | -0.122          | 0.537            |
|                     | LC Tyr093              | -29.320 | -28.335         | 11.178          | -5.322              | -4.924          | -1.918           |
| Ala052              | LC Tyr093 <sup>a</sup> | -5.769  | -2.648          | 3.622           | -2.275              | -4.577          | 0.109            |
| Leu053              | LC His094              | -3.614  | -3.375          | 0.023           | -0.421              | -0.666          | 0.824            |
| Tyr056 <sup>c</sup> | HC Trp050 <sup>a</sup> | -9.812  | -9.131          | 5.270           | -1.894              | -3.930          | -0.127           |
| Glu058 <sup>c</sup> | HC Ser052              | -34.429 | -32.178         | 7.696           | -5.379              | -4.790          | 0.221            |
|                     | HC Tyr054 <sup>a</sup> | -8.997  | -6.030          | 1.360           | -1.155              | -2.441          | -0.731           |
|                     | HC Gly055 <sup>a</sup> | -21.617 | -19.487         | 5.094           | -2.920              | -3.834          | -0.470           |
|                     | HC Gly056              | -9.195  | -9.292          | 0.064           | 2.427               | -0.809          | -1.585           |
|                     | HC Ser057 <sup>a</sup> | -33.139 | -29.452         | 10.098          | -5.691              | -5.286          | -2.807           |
| Met059              | HC Tyr054              | -4.631  | -3.003          | 0.777           | -0.865              | -1.747          | 0.207            |
| Glu060              | HC Gly056              | -5.084  | -5.029          | 0.074           | 0.890               | -0.267          | -0.751           |
| Asp061              | HC Gly055 <sup>a</sup> | -5.502  | -5.801          | 12.517          | -3.586              | -4.066          | -4.566           |
|                     | HC Thr074              | -8.112  | -11.015         | 0.056           | -1.193              | -0.808          | 4.848            |
| Lys062              | HC Gly055              | -6.840  | -7.432          | 3.150           | -1.302              | -1.598          | 0.342            |
| Asn063 <sup>c</sup> | HC Gly056              | -5.207  | -5.124          | 0.377           | 0.032               | -1.415          | 0.924            |
|                     | HC Ser057 <sup>a</sup> | -12.479 | -15.781         | 9.753           | -2.947              | -3.942          | 0.438            |
| Gln066 <sup>c</sup> | HC Ser057 <sup>a</sup> | -4.553  | -3.465          | 0.619           | -0.861              | -1.316          | 0.469            |
| Val068              | HC Tyr059              | -3.263  | -1.213          | 2.686           | -1.119              | -3.964          | 0.346            |
| His069              | LC Pro095              | -11.058 | -8.780          | 1.386           | -1.170              | -2.139          | -0.355           |
| Gln077              | HC Tyr059              | -11.001 | -9.372          | 1.590           | -1.563              | -2.392          | 0.736            |
|                     | HC Lys065              | -33.633 | -39.294         | 6.684           | -3.337              | -4.244          | 6.559            |
| His078              | HC Lys065              | -18.115 | -25.412         | 0.908           | -1.460              | -1.786          | 9.636            |
| Tyr112              | HC Tyr054 <sup>b</sup> | -17.445 | -17.439         | 6.963           | -3.331              | -3.654          | 0.016            |
| Arg113 <sup>c</sup> | HC Asp031              | -62.020 | -65.728         | 1.319           | -1.838              | -2.714          | 6.941            |
|                     | HC Ser032              | -8.355  | -6.667          | 0.978           | -1.028              | -1.673          | 0.035            |
|                     | HC Trp033              | -14.501 | -14.536         | 0.160           | -0.482              | -0.772          | 1.129            |
|                     | HC Ser052              | -9.513  | -9.290          | 3.433           | -1.792              | -2.354          | 0.491            |
|                     | HC Trp101              | -4.288  | 0.088           | 0.363           | -0.356              | -0.903          | -3.480           |
| Ser117              | HC Arg099              | -3.278  | -3.893          | 0.001           | -0.029              | -0.143          | 0.785            |
| Tyr118              | LC Leu092              | -4.116  | -1.633          | 0.305           | -0.631              | -1.982          | -0.176           |
| Gly120              | HC Arg099              | -27.659 | -28.284         | 6.225           | -2.403              | -2.789          | -0.408           |
|                     | LC Tyr091              | -5.267  | -3.283          | 1.696           | -1.221              | -2.372          | -0.086           |
| Ala121              | HC Pro102              | -13.458 | -14.378         | 7.438           | -2.731              | -3.213          | -0.573           |
| Tyr123 <sup>c</sup> | HC Asp031              | -10.199 | -9.238          | 3.483           | -2.123              | -4.218          | 1.897            |
|                     | HC Trp101 <sup>a</sup> | -5.266  | -1.211          | 2.009           | -0.206              | -5.760          | -0.098           |
| Arg125 <sup>c</sup> | HC Ser030 <sup>a</sup> | -6.762  | 2.562           | 1.216           | -0.819              | -1.351          | -8.369           |
|                     | HC Asp031 <sup>a</sup> | -95.935 | -119.479        | 13.434          | -6.671              | -7.169          | 23.951           |
|                     | HC Tyr054 <sup>a</sup> | -7.929  | -6.355          | 4.616           | -1.383              | -4.534          | -0.273           |

All energies are in kcal/mol.

The calculation has MP2/6-31G\*\*/PCM level

The subscripts HC and LC indicate the heavy and light chain, respectively

<sup>a</sup> The interactions were reported in ref 29

<sup>b</sup> The interactions were shifted by HOP fragmentation

<sup>c</sup> The residues were related with the mutagenesis data in ref 32

**Table S12** The PIEDA of Durvalumab/PD-L1 complex

| PD-L1  | Durvalumab            | PIE      | $\Delta E^{es}$ | $\Delta E^{ex}$ | $\Delta E^{ct+mix}$ | $\Delta E^{di}$ | $\Delta G^{sol}$ |
|--------|-----------------------|----------|-----------------|-----------------|---------------------|-----------------|------------------|
| Asp026 | LCArg028 <sup>a</sup> | -87.394  | -114.207        | 12.854          | -7.556              | -6.485          | 28.000           |
|        | LCSer031              | -22.327  | -27.668         | 11.723          | -5.253              | -5.803          | 4.674            |
|        | LCSer032              | -9.871   | -10.206         | 0.072           | 0.331               | -0.437          | 0.369            |
| Tyr056 | HCGlu057              | -12.877  | -10.052         | 1.342           | -1.208              | -2.581          | -0.378           |
| Glu058 | HCLys052 <sup>a</sup> | -95.929  | -112.415        | 5.345           | -4.342              | -3.928          | 19.412           |
| Asp061 | HCArg031              | -12.782  | -41.241         | -0.001          | -0.025              | -0.164          | 28.649           |
| Val111 | HCGlu105 <sup>a</sup> | -4.964   | -4.742          | 1.121           | -0.492              | -1.846          | 0.995            |
| Tyr112 | HCPhe103              | -4.380   | -3.010          | 2.333           | -1.221              | -2.393          | -0.090           |
| Arg113 | HCTrp033              | -3.572   | -1.764          | 4.542           | -1.322              | -4.213          | -0.815           |
|        | HCGlu057 <sup>a</sup> | -114.459 | -121.319        | 17.989          | -6.842              | -6.772          | 2.486            |
|        | HCPhe103              | -9.546   | -6.855          | 6.929           | -2.250              | -8.091          | 0.721            |
|        | HCGly104              | -3.526   | -3.685          | -0.001          | 0.048               | -0.191          | 0.303            |
| Met115 | HCGlu057              | -6.531   | -4.860          | 3.438           | -1.169              | -2.956          | -0.984           |
| Asp122 | LCLeu095              | -16.827  | -14.828         | 1.568           | -1.798              | -2.646          | 0.878            |
| Tyr123 | HCTyr059              | -5.404   | -2.431          | 3.999           | -1.400              | -5.298          | -0.274           |
|        | HCGlu099              | -5.738   | -5.811          | -0.001          | -0.119              | -0.153          | 0.347            |
|        | HCGly104              | -4.461   | -4.191          | 0.005           | -0.163              | -0.299          | 0.186            |
| Lys124 | LCSer094 <sup>a</sup> | -28.124  | -26.646         | 3.919           | -2.001              | -4.384          | 0.988            |
|        | LCTrp097 <sup>a</sup> | -3.350   | -3.567          | -0.001          | 0.039               | -0.179          | 0.358            |
| Arg125 | HCGlu099              | -52.597  | -55.381         | 0.002           | -0.039              | -0.213          | 3.034            |
|        | HCGly104 <sup>b</sup> | -33.965  | -35.077         | 9.682           | -4.077              | -4.988          | 0.494            |
|        | HCGlu105              | -50.995  | -54.760         | 0.356           | -0.322              | -1.932          | 5.662            |
|        | LCSer031              | -10.241  | -8.559          | -0.001          | 0.079               | -0.101          | -1.659           |
|        | LCGly093 <sup>b</sup> | -30.101  | -31.300         | 7.137           | -2.640              | -3.263          | -0.034           |
|        | LCSer094              | -4.637   | -3.854          | -0.002          | 0.048               | -0.210          | -0.619           |
|        | LCTrp097              | -8.361   | -7.222          | 2.715           | -1.439              | -2.856          | 0.441            |

All energies are in kcal/mol.

The calculation has MP2/6-31G\*\*/PCM level

The subscripts HC and LC indicate the heavy and light chain, respectively

<sup>a</sup> The interactions were reported in ref 33

<sup>b</sup> The interactions were shifted by HOP fragmentation

**Table S13** Water-bridge interaction in Durvalumab/PD-L1

| PIE     | PD-L1  | Water molecules     | Durvalumab           | PIE     |
|---------|--------|---------------------|----------------------|---------|
| -3.159  | Arg125 | <sup>A</sup> HOH203 | <sub>LC</sub> Ser030 | -11.483 |
| -14.556 | Ile126 |                     | <sub>LC</sub> Ser031 | -9.109  |
| -14.53  | Arg125 | <sup>A</sup> HOH210 | <sub>LC</sub> Ser094 | -12.337 |
| -3.672  | Ile126 |                     |                      |         |
| -12.793 | Tyr123 | <sup>B</sup> HOH304 | <sub>HC</sub> Asn050 | -4.83   |
|         |        |                     | <sub>HC</sub> Glu099 | -20.675 |
|         |        |                     | <sub>HC</sub> Gly104 | -8.627  |
| -22.273 | Asp122 | <sup>C</sup> HOH303 | <sub>LC</sub> Leu095 | -8.978  |
| -30.606 | Lys124 |                     |                      |         |
| -6.352  | Thr020 | <sup>C</sup> HOH317 | <sub>LC</sub> Pro096 | -10.208 |
| -23.817 | Asp122 |                     |                      |         |

All energies are in kcal/mol.

The calculation has MP2/6-31G\*\*/PCM level

The subscripts HC and LC indicate the heavy and light chain, respectively

The superscripts A, B and C indicate the chain arrangement

**Table S14** The PIEDA of peptide-57/PD-L1 complex

| <b>PD-L1</b> | <b>peptide-57</b> | <b>PIE</b> | $\Delta E^{es}$ | $\Delta E^{ex}$ | $\Delta E^{ct+mix}$ | $\Delta E^{di}$ | $\Delta G^{sol}$ |
|--------------|-------------------|------------|-----------------|-----------------|---------------------|-----------------|------------------|
| Tyr056       | Trp008            | -3.903     | -0.553          | 5.547           | -1.895              | -7.023          | 0.022            |
|              | Ser009            | -6.171     | -4.185          | 2.676           | -1.578              | -3.068          | -0.016           |
| Glu058       | Ser009            | -3.295     | -1.093          | 0.001           | 0.036               | -0.172          | -2.066           |
| Asn063       | Ser007            | -4.478     | -4.128          | 0.280           | -0.477              | -0.858          | 0.706            |
|              | Ser009            | -4.905     | -3.013          | 0.852           | -1.292              | -1.697          | 0.245            |
| Gln066       | Trp008            | -18.640    | -13.473         | 10.281          | -3.554              | -11.636         | -0.258           |
| Glu071       | Pro004            | -7.045     | -6.121          | 0.770           | -1.715              | -2.058          | 2.079            |
|              | His005            | -40.893    | -78.420         | 0.398           | -2.560              | -1.976          | 41.665           |
| Glu072       | His005            | -14.366    | -21.387         | -0.001          | 0.006               | -0.109          | 7.125            |
| Asp073       | His005            | -82.717    | -105.691        | 14.025          | -9.399              | -9.329          | 27.677           |
| Arg113       | Trp010            | -9.359     | 0.367           | 5.576           | -2.233              | -8.563          | -4.507           |
| Met115       | Trp010            | -3.326     | -1.390          | 1.019           | -0.986              | -2.327          | 0.359            |

All energies are in kcal/mol.

The calculation has MP2/6-31G\*\*/PCM level

**Table S15** Water-bridge interaction in peptide-57/PD-L1

| <b>PIE</b> | <b>PD-L1</b> | <b>Water molecules</b> | <b>peptide-57</b> | <b>PIE</b> |
|------------|--------------|------------------------|-------------------|------------|
| -13.242    | Phe067       | HOH307                 | His005            | -8.676     |
| -5.549     | Glu072       |                        |                   |            |
| -19.393    | Asp061       | HOH318                 | Trp010            | -5.297     |
| -3.532     | Arg113       |                        |                   |            |
| -5.253     | Asn063       | HOH321                 | Ser007            | -14.672    |
| -9.895     | Gln077       |                        |                   |            |

All energies are in kcal/mol.

The calculation has MP2/6-31G\*\*/PCM level



**Table S16** The PIEDA of peptide-71/PD-L1 complex

| PD-L1  | peptide-71 | PIE     | $\Delta E^{es}$ | $\Delta E^{ex}$ | $\Delta E^{ct+mix}$ | $\Delta E^{di}$ | $\Delta G^{sol}$ |
|--------|------------|---------|-----------------|-----------------|---------------------|-----------------|------------------|
| Val055 | MEA007     | -3.247  | -1.636          | 0.569           | -0.951              | -1.373          | 0.143            |
| Tyr056 | Phe001     | -9.233  | -4.073          | 5.230           | -2.375              | -8.451          | 0.436            |
| Glu058 | Phe001     | -55.134 | -55.365         | 0.000           | -0.144              | -0.293          | 0.668            |
|        | Tyr011     | -6.274  | -2.001          | 3.457           | -3.101              | -3.943          | -0.687           |
|        | Leu012     | -31.744 | -34.306         | 11.392          | -3.802              | -5.122          | 0.095            |
|        | CCS013     | -35.629 | -35.216         | 9.371           | -4.809              | -5.646          | 0.671            |
| Asp061 | Leu012     | -8.941  | -6.942          | 1.941           | -1.816              | -2.796          | 0.673            |
| Lys062 | Gly014     | -3.577  | -3.145          | 0.052           | 0.364               | -0.328          | -0.521           |
| Asn063 | CCS013     | -3.931  | -2.466          | 0.641           | -0.413              | -1.358          | -0.336           |
| Gln066 | Phe001     | -10.036 | -7.639          | 1.463           | -1.317              | -2.596          | 0.053            |
|        | MEA002     | -4.454  | -3.363          | 1.364           | -1.288              | -1.676          | 0.509            |
|        | 9KK003     | -4.112  | -2.962          | 1.193           | -0.441              | -1.760          | -0.143           |
| Arg113 | Tyr011     | -15.686 | -14.798         | 0.361           | -0.920              | -1.573          | 1.244            |
| Met115 | MEA007     | -4.719  | -1.835          | 2.655           | -1.258              | -4.330          | 0.049            |
| Tyr123 | Trp010     | -7.952  | -1.796          | 3.923           | -0.606              | -8.653          | -0.819           |

All energies are in kcal/mol.

The calculation has MP2/6-31G\*\*/PCM level

**Table S17** Water-bridge interaction in peptide-71/PD-L1

| <b>PIE</b> | <b>PD-L1</b> | <b>Water molecules</b> | <b>peptide-71</b> | <b>PIE</b> |
|------------|--------------|------------------------|-------------------|------------|
| -13.707    | Gln077       | HOH364                 | Phe001            | -3.355     |
| -3.552     | Gln066       | HOH457                 | 9KK003            | -6.714     |
| -4.827     | Asp073       |                        |                   |            |
| -5.706     | Arg113       | HOH110                 | Tyr011            | -11.846    |

All energies are in kcal/mol.

The calculation has MP2/6-31G\*\*/PCM level

**Table S18** The PIEDA Analysis on BMS-8 and two PD-L1 molecules

| PD-L1               | PIE     | $\Delta E^{es}$ | $\Delta E^{ex}$ | $\Delta E^{ct+mix}$ | $\Delta E^{di}$ | $\Delta G^{sol}$ |
|---------------------|---------|-----------------|-----------------|---------------------|-----------------|------------------|
| <sub>A</sub> Tyr056 | -10.512 | -5.231          | 12.414          | -3.852              | -13.491         | -0.352           |
| <sub>A</sub> Glu058 | -6.219  | -3.061          | 0.000           | 0.000               | 0.000           | -3.158           |
| <sub>A</sub> Gln066 | -4.031  | -5.186          | 12.295          | -3.148              | -8.633          | 0.641            |
| <sub>A</sub> Met115 | -5.523  | -2.245          | 5.396           | -1.464              | -7.308          | 0.097            |
| <sub>A</sub> Asp122 | -4.074  | -1.772          | 4.119           | -1.684              | -3.232          | -1.505           |
| <sub>B</sub> Tyr056 | -4.053  | -1.477          | 4.710           | -1.426              | -6.050          | 0.189            |
| <sub>B</sub> Met115 | -4.688  | -2.455          | 6.769           | -1.552              | -7.407          | -0.042           |
| <sub>B</sub> Ser117 | -3.352  | -0.892          | 2.229           | -0.810              | -3.437          | -0.442           |
| <sub>B</sub> Asp122 | -25.134 | -17.279         | 12.530          | -4.492              | -10.753         | -5.140           |
| <sub>B</sub> HOH206 | -4.193  | -3.003          | 3.781           | -1.820              | -2.742          | -0.409           |

All energies are in kcal/mol.

The calculation has MP2/6-31G\*\*/PCM level

The subscripts A and B indicate the chain arrangement

**Table S19** The PIEDA Analysis on BMS-202 and two PD-L1 molecules

| PD-L1               | PIE     | $\Delta E^{\text{es}}$ | $\Delta E^{\text{ex}}$ | $\Delta E^{\text{ct+mix}}$ | $\Delta E^{\text{di}}$ | $\Delta G^{\text{sol}}$ |
|---------------------|---------|------------------------|------------------------|----------------------------|------------------------|-------------------------|
| <sub>A</sub> Thr020 | -6.180  | -2.885                 | 6.364                  | -1.709                     | -5.595                 | -2.355                  |
| <sub>A</sub> Tyr056 | -3.528  | -2.153                 | 5.017                  | -1.568                     | -5.171                 | 0.347                   |
| <sub>A</sub> Met115 | -4.798  | -0.957                 | 2.333                  | -1.189                     | -4.570                 | -0.415                  |
| <sub>A</sub> Ser117 | -3.409  | -0.456                 | 0.997                  | -0.907                     | -2.681                 | -0.362                  |
| <sub>A</sub> Asp122 | -33.126 | -18.872                | 10.319                 | -4.898                     | -13.027                | -6.648                  |
| <sub>B</sub> Tyr056 | -10.521 | -3.576                 | 11.140                 | -3.860                     | -14.325                | 0.101                   |
| <sub>B</sub> Glu058 | -7.171  | -3.051                 | -0.001                 | -0.134                     | -0.208                 | -3.778                  |
| <sub>B</sub> Gln066 | -3.770  | -1.312                 | 5.334                  | -1.635                     | -5.643                 | -0.514                  |
| <sub>B</sub> Asp073 | -4.692  | 0.492                  | 0.000                  | 0.000                      | 0.000                  | -5.184                  |
| <sub>B</sub> Met115 | -5.777  | -1.830                 | 1.728                  | -1.070                     | -4.628                 | 0.023                   |
| <sub>B</sub> Asp122 | -4.941  | -1.569                 | 0.613                  | -0.480                     | -1.460                 | -2.045                  |
| <sub>A</sub> HOH301 | -3.246  | -1.665                 | 3.774                  | -2.029                     | -3.466                 | 0.140                   |
| <sub>A</sub> HOH316 | -3.469  | -1.188                 | 2.388                  | -2.320                     | -2.851                 | 0.502                   |
| <sub>B</sub> HOH325 | -3.055  | -1.381                 | 1.589                  | -1.411                     | -1.954                 | 0.103                   |

All energies are in kcal/mol.

The calculation has MP2/6-31G\*\*/PCM level

The subscripts A and B indicate the chain arrangement

**Table S20** The PIEDA Analysis on BMS-37 and two PD-L1 molecules

| PD-L1               | PIE     | $\Delta E^{\text{es}}$ | $\Delta E^{\text{ex}}$ | $\Delta E^{\text{ct+mix}}$ | $\Delta E^{\text{di}}$ | $\Delta G^{\text{sol}}$ |
|---------------------|---------|------------------------|------------------------|----------------------------|------------------------|-------------------------|
| <sub>A</sub> Thr020 | -3.375  | 1.978                  | 4.067                  | -1.936                     | -5.327                 | -2.156                  |
| <sub>A</sub> Tyr056 | -3.835  | -0.714                 | 2.897                  | -1.178                     | -5.024                 | 0.185                   |
| <sub>A</sub> Met115 | -4.965  | -1.579                 | 4.263                  | -1.074                     | -6.427                 | -0.148                  |
| <sub>A</sub> Asp122 | -36.479 | -25.253                | 15.802                 | -7.147                     | -15.666                | -4.215                  |
| <sub>B</sub> Tyr056 | -13.008 | -9.012                 | 20.204                 | -5.678                     | -18.334                | -0.188                  |
| <sub>B</sub> Glu058 | -5.005  | -2.577                 | 0.000                  | 0.041                      | -0.265                 | -2.204                  |
| <sub>B</sub> Gln066 | -5.815  | -7.442                 | 13.698                 | -4.038                     | -7.920                 | -0.113                  |
| <sub>B</sub> Met115 | -5.603  | -1.659                 | 6.276                  | -2.345                     | -7.847                 | -0.027                  |
| <sub>B</sub> Asp122 | -4.362  | -1.608                 | 0.602                  | -0.548                     | -1.942                 | -0.865                  |
| <sub>A</sub> HOH227 | -4.102  | -2.180                 | 3.836                  | -2.604                     | -3.490                 | 0.336                   |

All energies are in kcal/mol.

The calculation has MP2/6-31G\*\*/PCM level

The subscripts A and B indicate the chain arrangement

**Table S21** The PIEDA Analysis on BMS-200 and two PD-L1 molecules

| PD-L1               | PIE     | $\Delta E^{\text{es}}$ | $\Delta E^{\text{ex}}$ | $\Delta E^{\text{ct+mix}}$ | $\Delta E^{\text{di}}$ | $\Delta G^{\text{sol}}$ |
|---------------------|---------|------------------------|------------------------|----------------------------|------------------------|-------------------------|
| <sub>A</sub> Thr020 | -3.858  | 0.257                  | 1.436                  | -1.219                     | -2.801                 | -1.531                  |
| <sub>A</sub> Tyr056 | -4.045  | -0.898                 | 4.510                  | -1.927                     | -5.912                 | 0.182                   |
| <sub>A</sub> Met115 | -6.344  | -2.285                 | 3.872                  | -1.454                     | -6.462                 | -0.016                  |
| <sub>A</sub> Ser117 | -4.022  | -1.746                 | 1.372                  | -0.642                     | -2.792                 | -0.213                  |
| <sub>A</sub> Asp122 | -23.541 | -13.987                | 4.519                  | -3.678                     | -8.052                 | -2.344                  |
| <sub>B</sub> Tyr056 | -12.350 | -2.506                 | 7.543                  | -3.727                     | -13.440                | -0.221                  |
| <sub>B</sub> Glu058 | -4.079  | -3.023                 | 0.000                  | 0.000                      | 0.000                  | -1.056                  |
| <sub>B</sub> Gln066 | -11.432 | -12.819                | 13.371                 | -3.892                     | -7.797                 | -0.296                  |
| <sub>B</sub> Met115 | -3.650  | -3.434                 | 11.872                 | -2.474                     | -9.789                 | 0.175                   |
| <sub>B</sub> Ala121 | -3.323  | -1.267                 | 2.890                  | -0.853                     | -3.949                 | -0.144                  |
| <sub>B</sub> Asp122 | -5.636  | -2.311                 | 3.485                  | -2.657                     | -4.683                 | 0.530                   |
| <sub>B</sub> Tyr123 | -4.074  | -1.158                 | 1.087                  | 0.472                      | -4.276                 | -0.198                  |
| <sub>A</sub> HOH229 | -3.982  | -2.085                 | 2.080                  | -2.201                     | -1.980                 | 0.205                   |
| <sub>A</sub> HOH250 | -8.218  | -5.701                 | 1.456                  | -1.964                     | -2.549                 | 0.540                   |
| <sub>B</sub> HOH306 | -5.941  | -15.699                | 18.160                 | -4.789                     | -3.361                 | -0.252                  |
| <sub>B</sub> HOH316 | -5.479  | -16.327                | 21.239                 | -6.231                     | -3.546                 | -0.613                  |

All energies are in kcal/mol.

The calculation has MP2/6-31G\*\*/PCM level

The subscripts A and B indicate the chain arrangement
